# Supplementary material for: Synaptic Plasticity in Neural Networks Needs Homeostasis with a Fast Rate Detector
Source: PLOS journal article supplement (doi:10.1371/journal.pcbi.1003330), 2013-11-14
Supplement: S1 (10.1371/journal.pcbi.1003330.s001) [file journal.pcbi.1003330.s001]

**Figure S1**

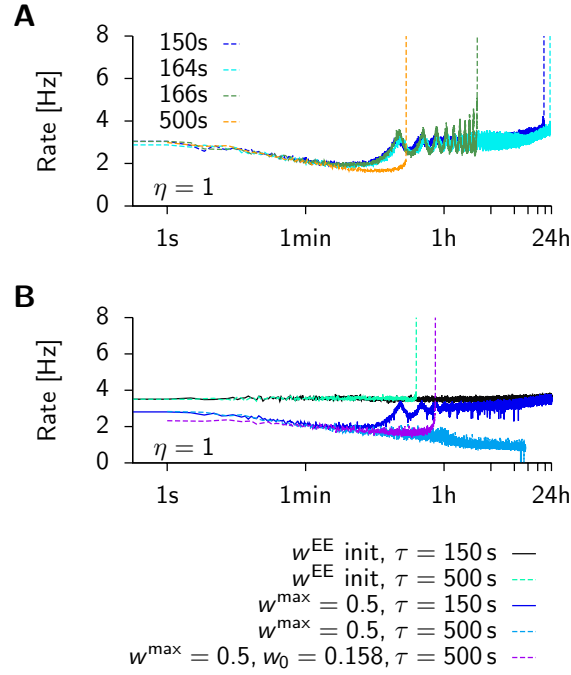

**Evolution of the population rate for metaplastic triplet STDP model.** (A) Temporal evolution of mean population rate for different values of  $\tau$  ( $\eta = 1$ ). While the change in stability in the vicinity of  $\tau^{\text{crit}} = 166 \text{ s}$  can be understood from the mean field theory, which also predicts the observed oscillations at criticality, the late destabilization of the curve  $\tau = 150 \text{ s}$  is not captured by the theory. (B) Evolution of mean population rate for  $\eta = 1$ . Black:  $\tau = 150 \text{ s}$  and weights are initialized with the weights from a stable run ( $\eta = 6.25$ ,  $\tau = 10 \text{ s}$ ) at  $t = 24 \text{ h}$ . Cyan: Same, but with  $\tau = 500 \text{ s}$ . Dark blue:  $\tau = 150 \text{ s}$ , weight initialization as in (A), but maximally allowed weights limited to  $w^{\max} = 0.5$ . Light blue:  $\tau = 500 \text{ s}$ , network falls silent at  $t \approx 10 \text{ h}$ . Purple:  $\tau = 500 \text{ s}$ , with  $w_0 = 0.158$  (the learning rate was unchanged), which reduces the initial excursion to low rates.
